# Supplementary material for: Application of a new assignment algorithm based on the minimax difference in earthquake emergency rescue
Source: Research Square preprint supplement (doi:10.21203/rs.3.rs-8742278/v1), 2026-02-17
Supplement: Supplementary file 1 [file 440b81bbb5a5a03390b01f69.docx]

Declaration of Interest Statement

The authors declare that they have no known competing financial interests or personal relationships that could have appeared to influence the work reported in this paper.
